# Supplementary material
Source: PubMed Central journal article supplement (PMC4206218)

Figure S1

**A**

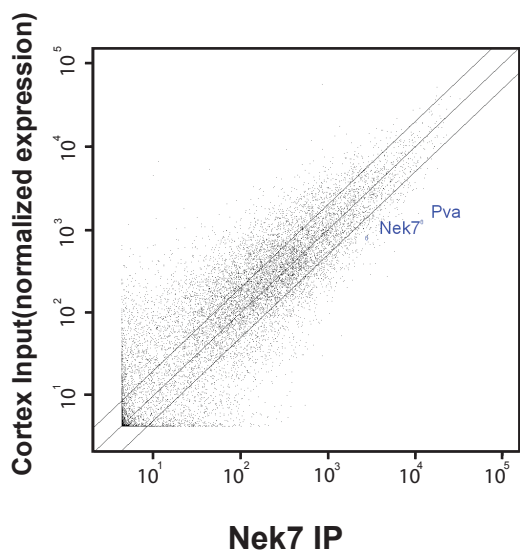

**B**

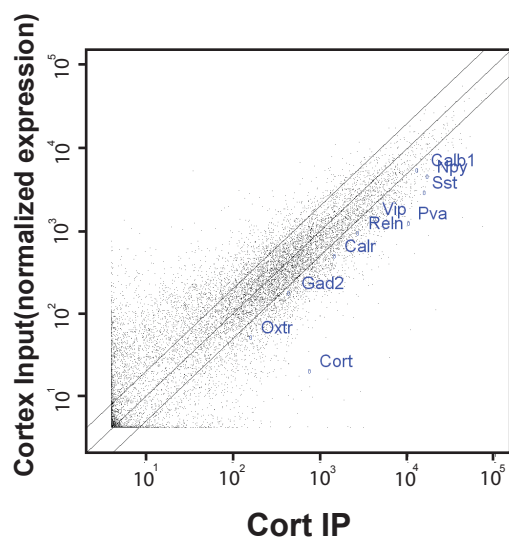

**C**

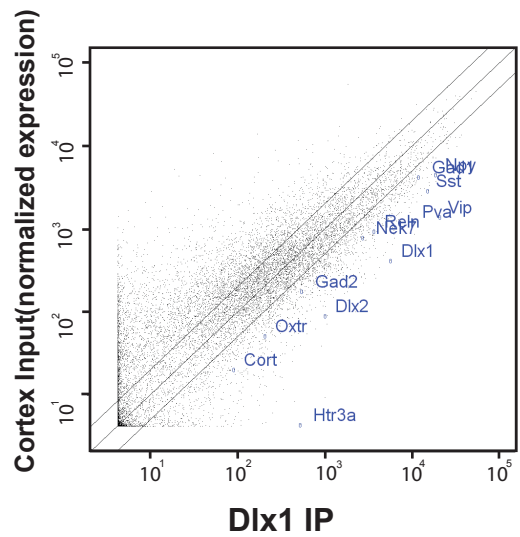

**D**

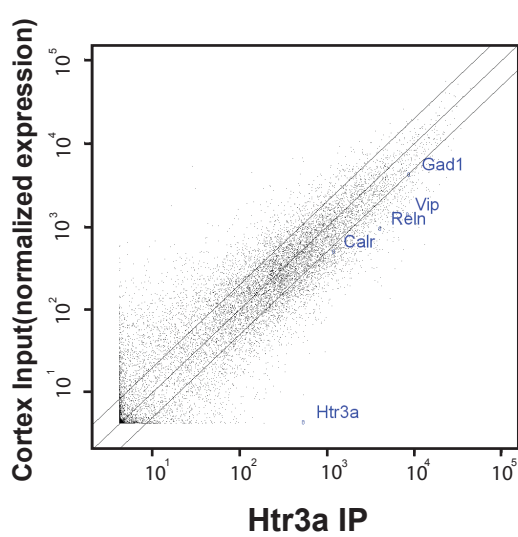

Supplement: NIHMS628836-supplement-1.pdf [file NIHMS628836-supplement-1.pdf]

Figure S2

**A**

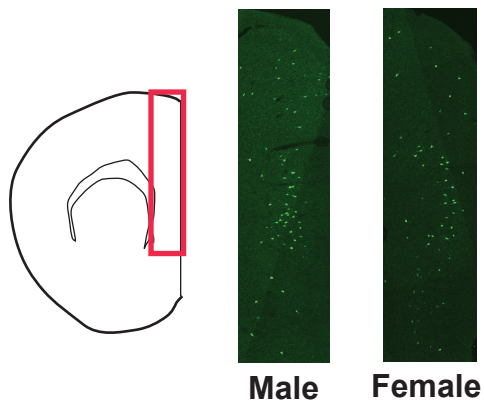

**B**

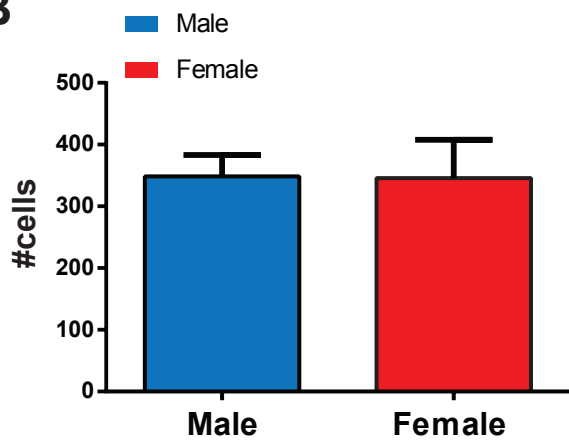

Supplement: NIHMS628836-supplement-2.pdf [file NIHMS628836-supplement-2.pdf]

Figure S3

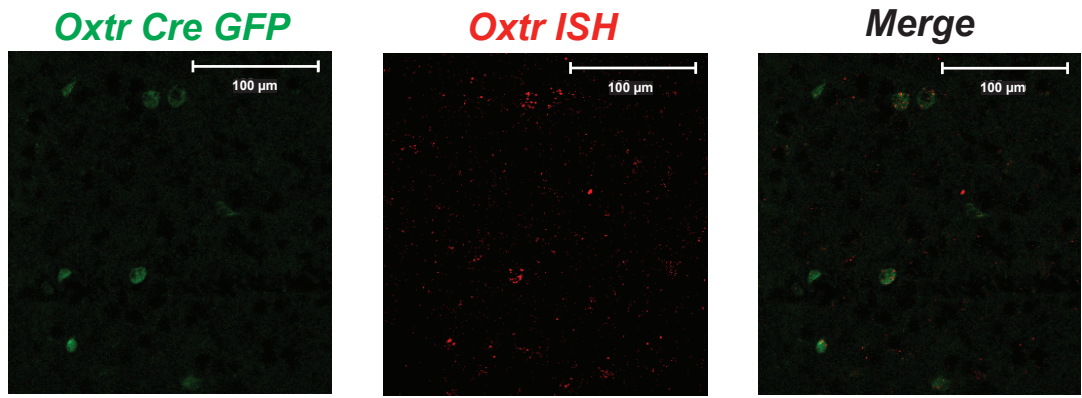

Supplement: NIHMS628836-supplement-3.pdf [file NIHMS628836-supplement-3.pdf]

Figure S4

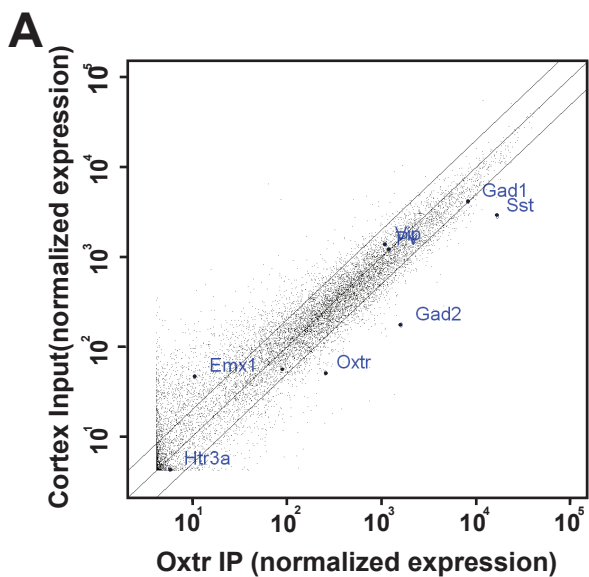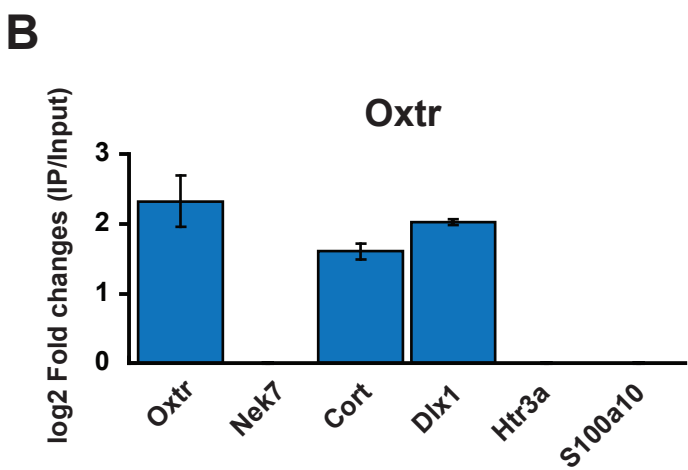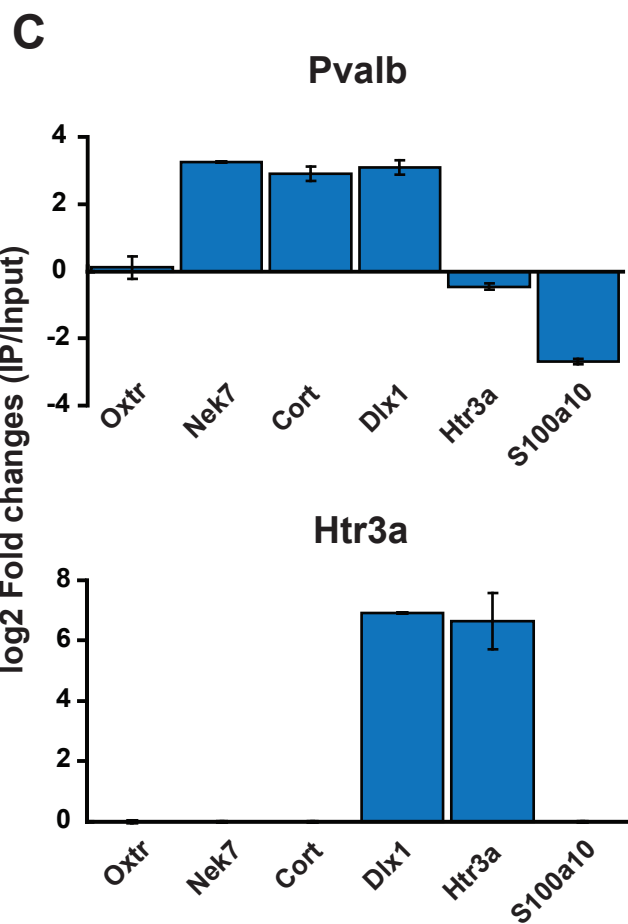

Supplement: NIHMS628836-supplement-4.pdf [file NIHMS628836-supplement-4.pdf]

Figure S5

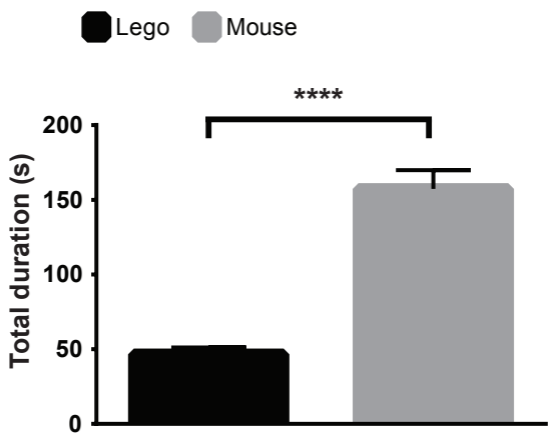

Supplement: NIHMS628836-supplement-5.pdf [file NIHMS628836-supplement-5.pdf]

Figure S6

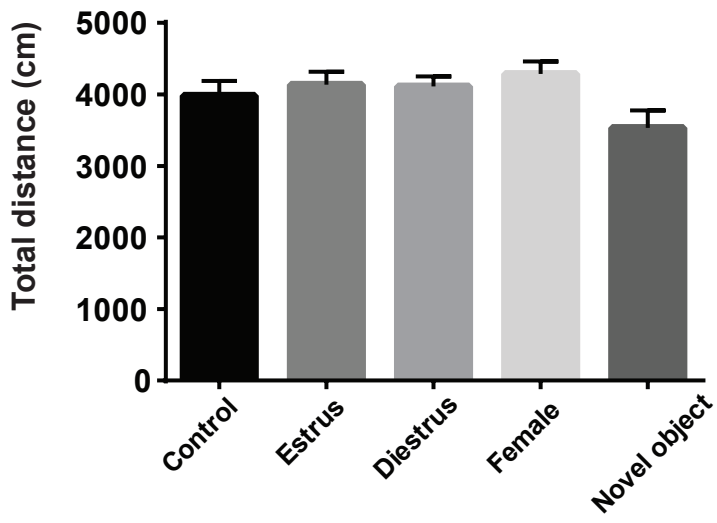

Supplement: NIHMS628836-supplement-6.pdf [file NIHMS628836-supplement-6.pdf]

Figure S7

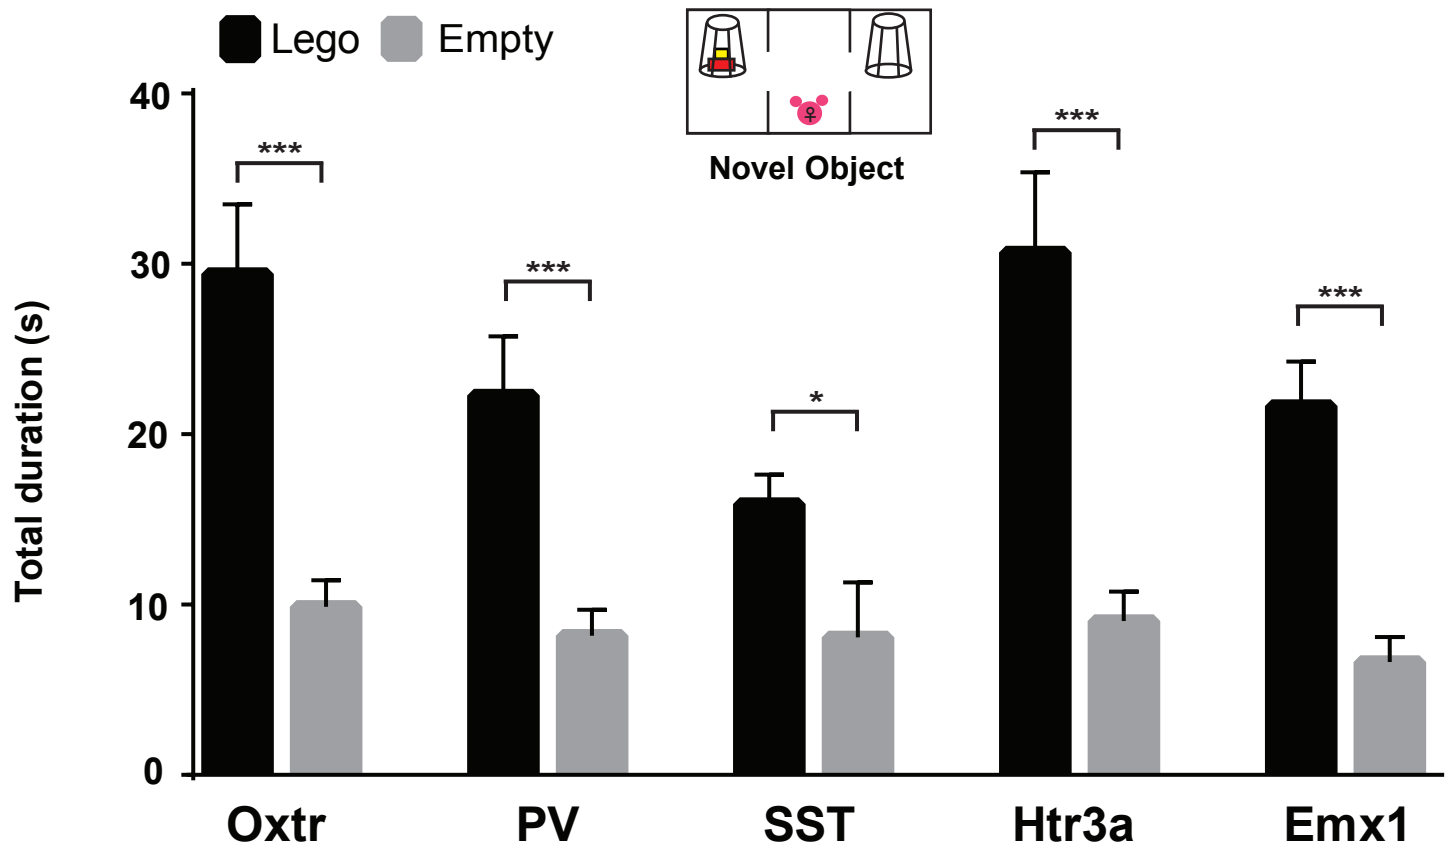

Supplement: NIHMS628836-supplement-7.pdf [file NIHMS628836-supplement-7.pdf]
